# Supplementary material for: Preparation and Characterization of an Electrospun Whey Protein/Polycaprolactone Nanofiber Membrane for Chromium Removal from Water
Source: MDPI journal article supplement (doi:10.3390/nano12162744), 2022-08-10
Supplement: s1 [file s1]

# Preparation and Characterization of an Electrospun Whey Protein/Polycaprolactone Nanofiber Membrane for Chromium Removal from Water

Laura Cristina Ramírez-Rodríguez <sup>1</sup>, María Ximena Quintanilla-Carvajal <sup>2</sup>, Didilia Ileana Mendoza-Castillo <sup>3,4</sup>, Adrián Bonilla-Petriciolet <sup>4</sup> and Carlos Jiménez-Junca <sup>5,\*</sup>

<sup>1</sup> Maestría en Diseño y Gestión de Procesos Facultad de Ingeniería, Campus Universitario Puente del Común, Universidad de la Sabana, Km. 7 Autopista Norte, Chia 25001, Colombia

<sup>2</sup> Agroindustrial Processes Research Group, Campus Universitario Puente del Común, Universidad de La Sabana, Km. 7 Autopista Norte, Chia 25001, Colombia

<sup>3</sup> CONACYT, Ciudad de México 03940, Mexico

<sup>4</sup> Departamento de Ingeniería Química, Instituto Tecnológico de Aguascalientes, Aguascalientes 20256, Mexico

<sup>5</sup> Bioprospecting Research Group, Campus Universitario Puente del Común, Universidad de La Sabana, Km. 7 Autopista Norte, Chia 25001, Colombia

\* Correspondence: carlos.jimenez@unisabana.edu.co; Tel.: +57-861-5555-25010

**Table S1.** Classical kinetic models.

| Model                   | Equation                                        |
|-------------------------|-------------------------------------------------|
| Pseudo first order      | $q_t = q_{te}(1 - e^{-K_1 t})$                  |
| Pseudo Second order     | $q_t = \frac{q_{te}^2 K_2 t}{1 + q_{te} K_2 t}$ |
| Intraparticle diffusion | $q_t = k_{te} t^{0.5} + C$                      |

Where  $q_t$  (mg/g) and  $q_{te}$  (mg/g) are the quantity of chromium adsorbed per mass unit of membrane at a given time  $t$ , and at equilibrium, respectively;  $K_1$  and  $K_2$  (mg min<sup>-1</sup>) are the first-order rate constant and second-order rate constant, respectively;  $k_{te}$  (mg/(g min<sup>1/2</sup>)) is the Intraparticle diffusion rate constant;  $C$  is a model constant (mg/g).

**Table S2.** Classical isotherm models.

| Model      | Equation                                            |
|------------|-----------------------------------------------------|
| Langmuir   | $q_e = \frac{q_m K_L C_e}{1 + K_L C_e}$             |
| Freundlich | $q_e = K_F C_e^{1/n}$                               |
| Sips       | $q_e = \frac{q_s K_s C_e^{n_s}}{1 + K_s C_e^{n_s}}$ |

Where  $q_e$  and  $C_e$  are the adsorption capacity (mg/g) and concentration (mg/L) at equilibrium,  $q_m$  and  $q_s$  are the theoretical maximum adsorption capacity (mg/g),  $K_L$  (L/mg),  $K_F$  (mg<sup>1-1/n</sup> L<sup>1/n</sup> g<sup>-1</sup>),  $K_s$  (L<sup>ns</sup>/mg<sup>ns</sup>) represents the Langmuir, Freundlich and Sips equilibrium constants,  $n$  is the parameters characteristic of the adsorbent-adsorbate system and  $n_s$  is the heterogeneity Sips parameter.

**Table S3.** Results of data correlation of adsorption isotherms to classical models for chromium removal from aqueous solutions using and WPI-PCL adsorptive membrane.

| Temperature (°C) | pH | Model    |       |       |            |     |       |
|------------------|----|----------|-------|-------|------------|-----|-------|
|                  |    | Langmuir |       |       | Freundlich |     |       |
|                  |    | $q_m$    | $K_L$ | $R^2$ | $K_F$      | $n$ | $R^2$ |
| 20               | 2  | 26.4     | 0.039 | 0.96  | 3.1        | 2.4 | 0.87  |
|                  | 2  | 31.4     | 0.072 | 0.98  | 5.7        | 2.8 | 0.94  |
| 30               | 3  | 13.5     | 0.069 | 0.98  | 2.0        | 2.4 | 0.92  |
|                  | 5  | 10.5     | 0.110 | 0.98  | 2.3        | 2.8 | 0.96  |
|                  | 9  | 7.5      | 0.327 | 0.96  | 3.2        | 5.3 | 0.92  |

|    |     |       |      |     |     |      |
|----|-----|-------|------|-----|-----|------|
| 11 | 3.1 | 0.561 | 0.99 | 1.4 | 5.1 | 0.86 |
|----|-----|-------|------|-----|-----|------|

**Table S4.** Contributions of individual chemical moieties in the high-resolution spectra of the WPI-PCL adsorptive membrane before and after chromium adsorption.

| Element   | Chemical moiety | Before         |                    | After          |                    |
|-----------|-----------------|----------------|--------------------|----------------|--------------------|
|           |                 | Binding Energy | % Relative Content | Binding Energy | % Relative Content |
| Cr 2p 3/2 | Cr (VI)         | -              | -                  | 577.6          | 23.73              |
|           | Cr (III)        | -              | -                  | 579.3          | 41.25              |
| Cr 2p 1/2 | Cr (VI)         | -              | -                  | 586.89         | 14.98              |
|           | Cr (III)        | -              | -                  | 589.56         | 20.04              |
| C1 s      | C-(C,H)         | 284.8          | 31.92              | 284.81         | 41.07              |
|           | C-O             | 286.1          | 49.71              | 285.9          | 43.49              |
|           | C=O             | 288.73         | 18.37              | 288.43         | 15.45              |
| O1 s      | C-O             | 533.66         | 71.88              | 533.32         | 48.1               |
|           | C=O             | 532.13         | 28.12              | 531.91         | 51.9               |
| N1 s      | NHC=O           | 401.26         | 38.17              | 400.36         | 36.83              |
|           | NH2             | 399.87         | 48.07              | 399.93         | 44.43              |
|           | NH3             | 401.91         | 13.76              | 400.75         | 18.75              |

**Table S5.** Results of the atomic concentration of the general XPS before and after chromium adsorption by the membrane.

| Atomic concentration [%] |        |       |
|--------------------------|--------|-------|
| Element                  | Before | After |
| C                        | 74.95  | 75.07 |
| O                        | 18.18  | 19.8  |
| N                        | 6.86   | 4.37  |
| Cr                       | -      | 0.76  |
